# Supplementary material for: Emergence of nonvaccine Streptococcus pneumoniae following a 13-valent pneumococcal conjugate vaccine and schedule change in Mozambique: implications for a national immunization strategy
Source: Research Square preprint supplement (doi:10.21203/rs.3.rs-7722758/v1), 2025-11-04
Supplement: Supplementary file 1 [file 8c1fa6b76eed020873985ea1.docx]

**Supplementary Table S1:**  Catchment population by each hospital per year based on 2007 census (population from 2013-2016) and 2017 census (population from 2017-2023)

| **Study Site** | **Age** | **Year** | | | | | | | | | | |
| --- | --- | --- | --- | --- | --- | --- | --- | --- | --- | --- | --- | --- |
| **2013** | **2014** | **2015** | **2016** | **2017** | **2018** | **2019** | **2020** | **2021** | **2022** | **2023** |
| **Nampula Central Hospital** | <5 Years (Total) | 83 232 | 84 700 | 86 037 | 87 231 | 138 845 | 136 235 | 133949 | 133149 | 135 945 | 166864 | 178222 |
| 0-11 months | 18949 | 19272 | 19551 | 19784 | 20818 | 28276 | 28960 | 29806 | 30663 | 31 560 | 32 502 |
| 12 a 23 months | 31499 | 28788 | 30583 | 29677 | 57425 | 47562 | 47985 | 55890 | 57449 | 59 176 | 60 954 |
| 24 a 59months | 32784 | 36640 | 35903 | 37770 | 60602 | 60397 | 57004 | 47453 | 47833 | 76 128 | 84 766 |
| **Beira Central Hospital** | **Age** | **Year** | | | | | | | | | | |
| **2013** | **2014** | **2015** | **2016** | **2017** | **2018** | **2019** | **2020** | **2021** | **2022** | **2023** |
| <5 Years (Total) | 57 187 | 56 318 | 55 504 | 54 737 | 88115 | 91531 | 95191 | 99578 | 105715 | 129600 | 114 651 |
| 0-11 months | 12110 | 11967 | 11816 | 11659 | 14853 | 22574 | 22966 | 23570 | 24129 | 24 688 | 2 014 |
| 12 a 23 months | 22539 | 22176 | 21844 | 21539 | 36040 | 31847 | 36591 | 44444 | 45465 | 46 620 | 68 285 |
| 24 a 59 months | 22539 | 22176 | 21844 | 21539 | 37222 | 37110 | 35634 | 31564 | 36121 | 58292 | 44 352 |
| **Maputo Central Hospital** | **Age** | **Year** | | | | | | | | | | |
| **2013** | **2014** | **2015** | **2016** | **2017** | **2018** | **2019** | **2020** | **2021** | **2022** | **2023** |
| <5 Years (Total) | 136 989 | 136 161 | 135 530 | 135 097 | 116 454 | 114 949 | 113 837 | 113 724 | 115 552 | 137 801 | 194 494 |
| 0-11 months | 27449 | 27453 | 27425 | 27366 | 19 353 | 26199 | 25888 | 25686 | 25456 | 25209 | 11 967 |
| 12 a 23 months | 53770 | 50354 | 53053 | 52866 | 47261 | 40714 | 43197 | 49645 | 49221 | 48873 | 44 352 |
| 24 a 59 months | 55770 | 58354 | 55053 | 54866 | 49840 | 48036 | 44752 | 38393 | 40875 | 63719 | 138 175 |
